# Supplementary material
Source: PubMed Central journal article supplement (PMC9072578)
Supplement: mmc1.pdf [file mmc1.pdf]

**Biophysical Journal, Volume 121**

**Supplemental information**

**High turnover and rescue effect of XRCC1 in response to heavy charged  
particle radiation**

**Wenjing Liu, Ruqun Wu, Jinlong Guo, Cheng Shen, Jing Zhao, Guangbo Mao, Hongjin  
Mou, Lei Zhang, and Guanghua Du**

# Supporting Material

## High Turnover and Rescue Effect of XRCC1 in Response to Heavy Charged Particle Radiation

Wenjing Liu<sup>1,2</sup>, Ruqun Wu<sup>1</sup>, Jinlong Guo<sup>1,2</sup>, Cheng Shen<sup>1,2</sup>, Jing Zhao<sup>1,2</sup>, Guangbo Mao<sup>1,3</sup>,  
Hongjin Mou<sup>1,3</sup>, Lei Zhang<sup>1,2</sup>, Guanghua Du<sup>1,2,\*</sup>

<sup>1</sup> Materials research center, Institute of Modern Physics, Lanzhou, Gansu, China

<sup>2</sup> Institute of Modern Physics, University of Chinese Academy of Sciences, Beijing, Beijing, China

<sup>3</sup> School of Materials and Energy, Lanzhou University, Lanzhou, Gansu, China

\* Correspondence: gh\_du@impcas.ac.cn

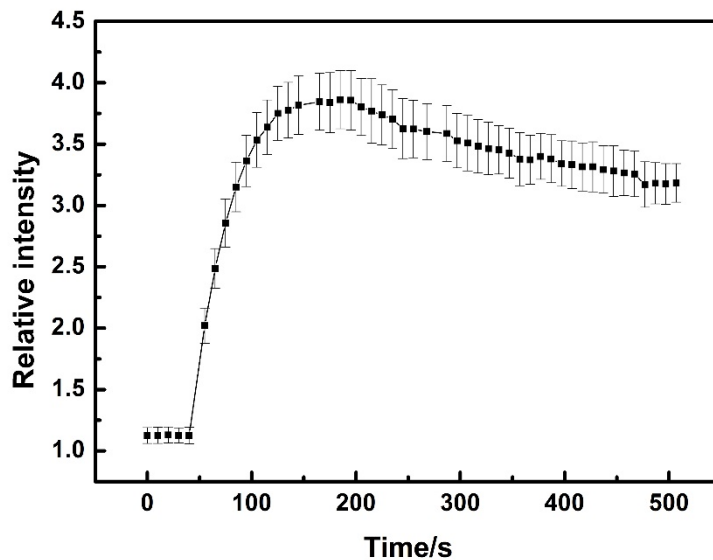

Figure S1. The kinetics of XRCC1 protein in HT1080 (XRCC1-RFP) cells exposed to 5.5 MeV/u Kr ions. The recruitment rate constant  $k_1$  is  $2.47 \pm 0.29 \times 10^{-2} \text{ s}^{-1}$ , and dissociation rate constant  $k_2$  is  $1.28 \pm 0.17 \times 10^{-3} \text{ s}^{-1}$ . The data represent the measured mean value and the standard error of 6 cells. Ion irradiated is  $2.0 \pm 0.5$  per cell.
